# Supplementary material for: The Association of Food Consumption Scores, Body Shape Index, and Hypertension in a Seven-Year Follow-Up among Indonesian Adults: A Longitudinal Study
Source: PubMed Central journal article supplement (PMC5800274; doi:10.3390/ijerph15010175), 2018-01-22
Supplement: ijerph-15-00175-s001.pdf [file ijerph-15-00175-s001.pdf]

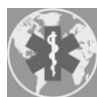

1 **Supplementary Table S1. The percentages in food consumption score changes between 2007 and 2014.**

| FCS  | All              |        |                  |       | Women            |        |                  |       | Men              |        |                  |       |
|------|------------------|--------|------------------|-------|------------------|--------|------------------|-------|------------------|--------|------------------|-------|
|      | 25 <sup>th</sup> | Median | 75 <sup>th</sup> | Mean  | 25 <sup>th</sup> | Median | 75 <sup>th</sup> | Mean  | 25 <sup>th</sup> | Median | 75 <sup>th</sup> | Mean  |
| 2007 | 35               | 49     | 65               | 50.76 | 34               | 47     | 64               | 49.64 | 36               | 51     | 66               | 51.95 |
| 2014 | 22               | 34     | 42               | 33.77 | 21               | 33     | 42               | 33.29 | 23               | 35     | 42               | 34.29 |

  

| FCS changes | % of Participants in Each Category |            |            |
|-------------|------------------------------------|------------|------------|
|             | All                                | Women      | Men        |
| Increase    | 432(20.04)                         | 235(21.19) | 197(18.82) |
| Maintain    | 39(1.81)                           | 17(1.53)   | 22(2.10)   |
| Decreased   | 1685(78.15)                        | 857(77.28) | 828(79.08) |

2 Abbreviations: FCS, food consumption score. The FCS change is presenting in n(%).
